# Supplementary material for: Optical and surface enhanced Raman scattering properties of Au nanoparticles embedded in and located on a carbonaceous matrix
Source: Royal Society of Chemistry journal article supplement (doi:10.1039/c5cp06134b), 2015-12-14
Supplement: c5cp06134b1.pdf [file c5cp06134b1.pdf]

# Supporting Information Description: Supplementary Figure S1

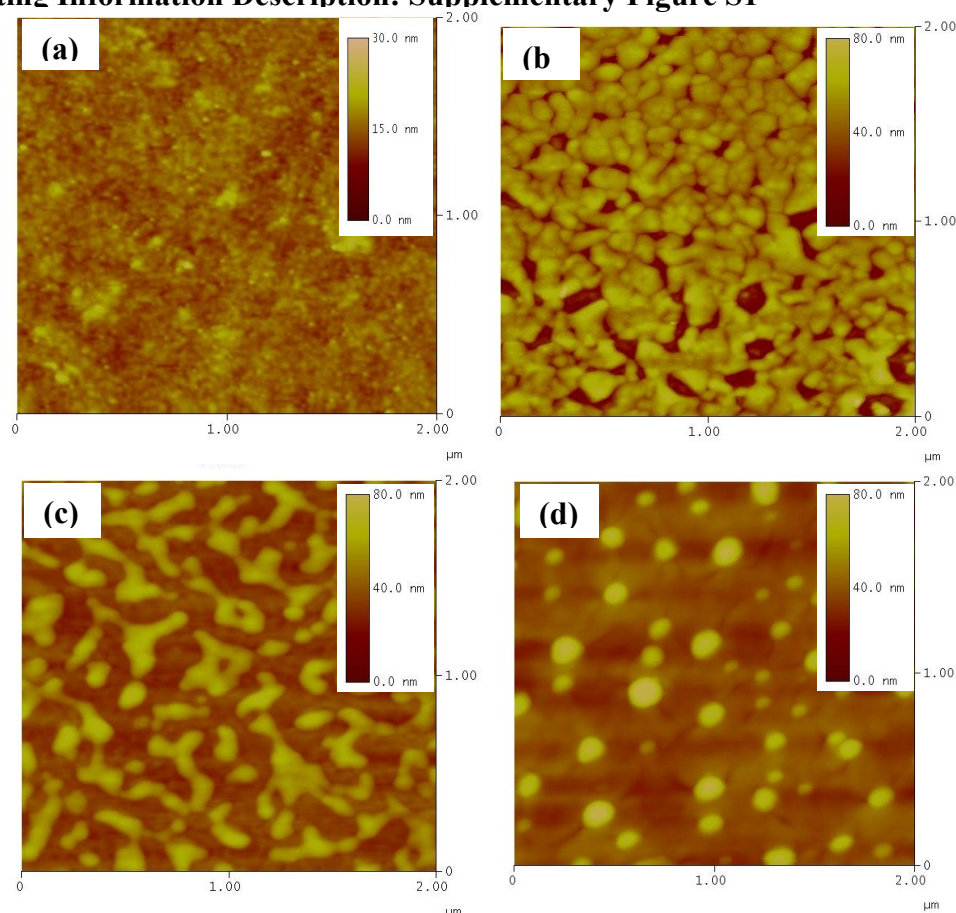

| 150 keV Ar ion Fluence ( ions/cm <sup>2</sup> ) | Roughness (nm) |
|-------------------------------------------------|----------------|
| (a) pristine                                    | 2              |
| (b) $5 \times 10^{15}$                          | 5              |
| (c) $1 \times 10^{16}$                          | 7              |
| (d) $5 \times 10^{16}$                          | 6              |

**Figure S1.** AFM images of (a) as deposited Au film on PET and films after 150 keV Ar ion irradiation at fluences of (b)  $5 \times 10^{15}$ , (c)  $1 \times 10^{16}$ , and (d)  $5 \times 10^{16}$  ions/cm<sup>2</sup>. Table includes the roughness values of the respective samples. [Figures reproduced from: Jai Prakash et al., Synthesis of Au nanoparticles at the surface and embedded in carbonaceous matrix by 150 keV Ar ion irradiation, J. Phys. D: Appl. Phys 44, 125302 (2011) with permission from IOP publishing Ltd., Bristol].
